1 **Host transcriptional response to TB preventive therapy differentiates two sub-**  
2 **groups of IGRA-positive individuals**

3  
4 Claire Broderick<sup>1,2,3\*</sup>, Jacqueline M Cliff<sup>2,4</sup>, Ji-Sook Lee<sup>2,4</sup>, Myrsini Kaforou<sup>3</sup>, David AJ Moore<sup>1,2</sup>

5  
6

7 1. Clinical Research Department, Faculty of Infectious and Tropical Diseases, London School  
8 of Hygiene and Tropical Medicine, Keppel St, London WC1E 7HT, UK

9 2. TB Centre, London School of Hygiene and Tropical Medicine, Keppel St, London WC1E 7HT,  
10 UK

11 3. Section for Paediatric Infectious Disease, Department of Infectious Disease, Faculty of  
12 Medicine, Imperial College London, London W2 1PG, UK

13 4. Department of Infection Biology, Faculty of Infectious and Tropical Diseases, London  
14 School of Hygiene and Tropical Medicine, Keppel St, London WC1E 7HT, UK

15  
16

17 \*Corresponding author: Claire Broderick, [c.broderick@imperial.ac.uk](mailto:c.broderick@imperial.ac.uk)

18  
19

20  
21

22 **Keywords**

23 Latent tuberculosis infection

24 Preventive therapy

25 Transcriptome

26  
27

28

29 **Abstract**

30 We investigated the longitudinal whole blood transcriptional profile responses to tuberculosis  
31 preventive therapy of 18 IGRA-positive tuberculosis contacts and IGRA-negative,  
32 tuberculosis-unexposed healthy controls.

33

34 Longitudinal unsupervised clustering analysis with a subset of 474 most variable genes in  
35 antigen-stimulated blood separated the IGRA+ participants into two distinct subgroups, one  
36 of which clustered with the IGRA-negative controls. 117 probes were significantly  
37 differentially expressed over time between the two cluster groups, many of them associated  
38 with immunological pathways important in mycobacterial control.

39

40 We contend that the differential host RNA response reflects lack of *M.tuberculosis* (*Mtb*)  
41 viability in the group that clustered with the IGRA- unexposed healthy controls, and *Mtb*  
42 viability in the group (1/3 of IGRA-positives) that clustered away.

43

44 Gene expression patterns in the blood of IGRA+ individuals emerging during the course of PT,  
45 which reflect *Mtb* viability, could have major implications in the identification of risk of  
46 progression, treatment stratification and biomarker development.

47

## 48 Introduction

49  
50 The term latent tuberculosis infection (LTBI) is loaded with the inference that viable  
51 *Mycobacterium tuberculosis* (*Mtb*) organisms are present in the affected individual which,  
52 under the right circumstances, have the capacity to cause reactivation and TB disease. Tests  
53 of immunological reactivity, whether delayed type hypersensitivity reactions measured in the  
54 tuberculin skin test (TST) or T lymphocyte stimulation though antigen recognition in the  
55 interferon gamma release assays (IGRAs) are widely referred to as tests for LTBI [1].

56  
57 However, neither approach demonstrates presence of viable *Mtb* bacilli and there is no  
58 histopathological hallmark of LTBI. The lifetime risk of reactivation disease from an *Mtb*  
59 infection acquired remotely in time is around 10%, with most of that risk believed to arise  
60 during the first five years after infection [2]. In the interval between acquisition of infection  
61 and development of disease, *Mtb* maintains viability and is assumed to be slowly replicating,  
62 either under close immunological control or in a relatively immunologically privileged  
63 location. Thus LTBI induces immunological sensitization as reflected in the TST and IGRA, tests  
64 that demonstrate immunological memory for prior exposure to mycobacterial antigens.

65  
66 Nevertheless, 90% of individuals demonstrating immunological recognition of *Mtb* antigens  
67 by positive IGRA or TST never develop active TB disease. Taking the inherent assumption that  
68 TST and IGRA are indicators of LTBI to its logical conclusion, the 90% who escape development  
69 of TB do so because the immune control-pathogen balance remains in favor of the human  
70 host. An alternative explanation might be that a large proportion of those with positive TST  
71 and IGRA testing do not harbor viable organisms and are thus incapable of progressing to  
72 reactivation TB.

73  
74 Preventive therapy (PT), in which a limited course of anti-TB antibiotics is used to sterilize  
75 presumed viable infection in individuals with positive TST and/or IGRA tests, has been shown  
76 to be highly effective in reducing the risk of future TB disease [3].

77  
78 We hypothesized that differentiation of LTBI with viable bacilli from immunological  
79 sensitization without viable infection could be achieved by investigating the whole blood

80 transcriptomic response to effective PT. We hypothesized that mycobacterial killing from  
81 effective LTBI PT would lead to a detectable alteration in the transcriptome that would not  
82 be seen in those individuals in whom there were no *Mtb* to be killed, whether these were  
83 IGRA/TST positive or healthy IGRA/TST negative controls with no known prior TB exposure.

84

## 85 **Results**

86

### 87 **Recruitment of participants**

88 Thirty adult IGRA-positive (IGRA+) participants were recruited to the study in the period  
89 October 2016 to January 2018, of whom 20 took a 12-week course of daily combined  
90 rifampicin/ isoniazid (RH) as preventive therapy (PT) and completed study follow-up. Adult  
91 IGRA-negative (IGRA-) healthy volunteers were recruited to the study and completed a two-  
92 week course of daily RH. Blood samples were collected from all participants at baseline (V1)  
93 and 2 weeks after initiating RH (V2), with an additional sample point in IGRA+ participants  
94 within 6 weeks of completion of the 12-week course of treatment (V3). At every timepoint,  
95 an unstimulated PAXgene whole blood sample and a stimulated blood sample (via  
96 QuantiFERON TB Gold Plus, Qiagen) was collected.

97

98 After quality control and pre-processing, 18 IGRA+ individuals and 4 IGRA- healthy controls  
99 were taken forward for comparator analyses (Figure 1, Figure 1-figure supplement 1). Recent  
100 exposure to drug-susceptible pulmonary TB was confirmed for 15/18 IGRA+s. There was no  
101 significant difference in age, gender, ethnicity or BCG status between the 18 IGRA+s and 4  
102 IGRA- healthy controls (Table 1).

103

### 104 **Comparing gene expression profiles for IGRA+ versus IGRA- participants**

105 First, we evaluated whether there were discernable differences in gene expression between  
106 the IGRA+ participants and IGRA- healthy controls, using linear models[4]. In the unstimulated  
107 PAXgene blood samples, no transcripts were found to be significantly differentially expressed  
108 (SDE) between the IGRA+ and IGRA- participants at baseline (V1) or V2 (Benjamini-Hochberg  
109 [BH] corrected p value < 0.05).

110

111 **Figure 1**

112 Study overview, showing patient numbers and exclusions.

113

114

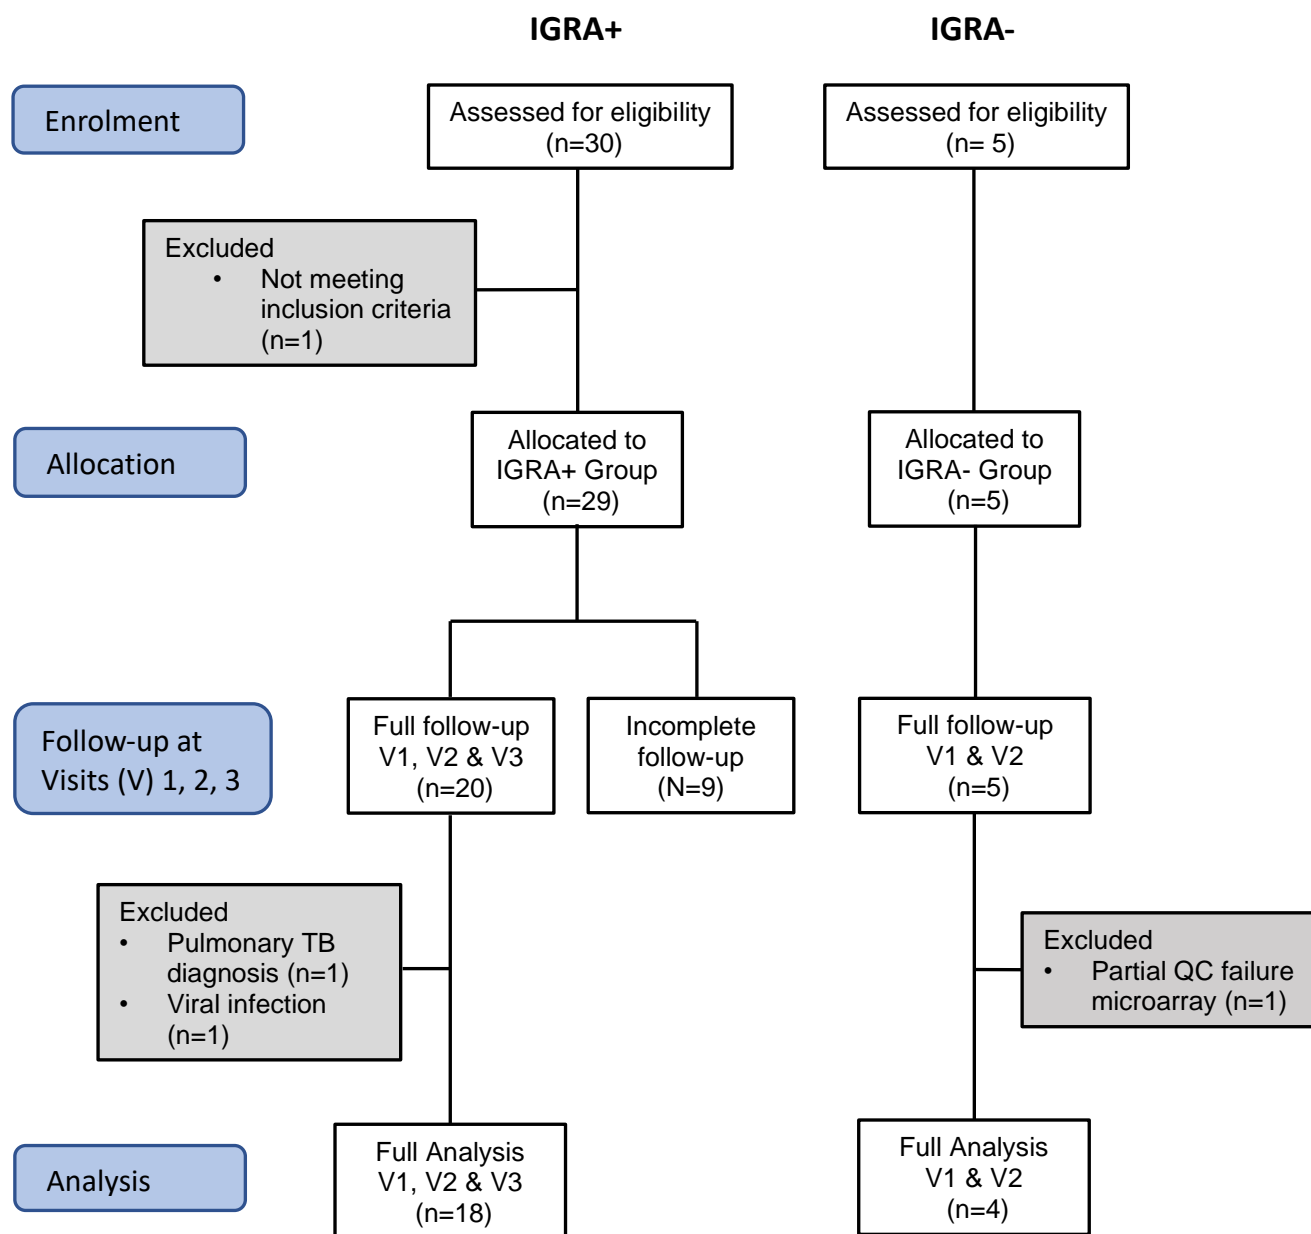

115

116

117 **Table 1**

118 Subject Characteristics.

|                                               |                    | <b>IGRA+ group</b> | <b>IGRA- Healthy control group</b> |
|-----------------------------------------------|--------------------|--------------------|------------------------------------|
| Number                                        |                    | 18                 | 4                                  |
| Age in years: Median (IQR)                    |                    | 34 (28-38)         | 28 (27-29)                         |
| Gender                                        | Male               | 10 (56%)           | 3 (75%)                            |
|                                               | Female             | 8 (44%)            | 1 (25%)                            |
| Confirmed recent drug-susceptible TB exposure | Yes                | 15 (83%)           | 0 (0%)                             |
|                                               | No                 | 3 (17%)            | 4 (100%)                           |
| BCG                                           | Yes                | 14 (78%)           | 2 (50%)                            |
|                                               | No                 | 2 (11%)            | 2 (50%)                            |
|                                               | Unknown            | 2 (11%)            | 0 (0%)                             |
| Continent of Birth                            | Africa             | 4 (22%)            | 0 (0%)                             |
|                                               | Asia               | 4 (22%)            | 0 (0%)                             |
|                                               | Australasia        | 0 (0%)             | 1 (25%)                            |
|                                               | Europe             | 9 (50%)            | 2 (50%)                            |
|                                               | North America      | 0 (0%)             | 1 (25%)                            |
|                                               | South America      | 1 (6%)             | 0 (0%)                             |
|                                               | Unknown            | 0 (0%)             | 0 (0%)                             |
| Ethnicity                                     | Asian <sup>1</sup> | 5 (28%)            | 2 (50%)                            |
|                                               | Black <sup>2</sup> | 4 (22%)            | 0 (0%)                             |
|                                               | White <sup>3</sup> | 8 (44%)            | 2 (50%)                            |
|                                               | Other <sup>4</sup> | 1 (6%)             | 0 (0%)                             |

119 <sup>1</sup>Includes Bengali, Hong Kong, Kurdish, Sri Lankan, Turkish; <sup>2</sup>Includes Black African; <sup>3</sup>Includes White  
 120 British, Polish, Romanian, White other; <sup>4</sup>Includes Latin American, Unknown

121

122

123 In this study, QuantiFERON-TB Gold Plus TB1 and TB2 tubes were used to stimulate whole  
124 blood. While both tubes contain peptides from ESAT-6 and CFP-10 *Mycobacterium*  
125 *tuberculosis* (*Mtb*) antigens, the TB1 tube peptides are designed to stimulate CD4+ T cells,  
126 and the TB2 peptides to stimulate both CD4+ and CD8+ T cells [5]. In contrast to the PAXgene  
127 tube whole blood samples, in the TB1-stimulated samples, 123 transcripts were SDE between  
128 IGRA+ and IGRA- individuals in the baseline (V1) samples and 93 were SDE between IGRA+  
129 and IGRA- individuals in the V2 samples (BH corrected p value < 0.05) (Figure 2A and 2B and  
130 listed in Supplementary File 1). In the TB2-stimulated blood samples, when IGRA+ individuals  
131 were compared to IGRA-, 43 transcripts were found to be SDE in the V1 samples and 86 in the  
132 V2 samples. (BH corrected p value < 0.05) (Figure 2C and 2D and listed in Supplementary File  
133 1). In summary, in vitro stimulation was necessary to distinguish the IGRA+ group from the  
134 IGRA- group.

135

### 136 **Effects of stimulation on whole blood gene expression**

137 In addition to the TB1 and TB2 *Mtb*-peptide-containing tubes, the QuantiFERON-TB Gold Plus  
138 kit also includes a “negative” tube which contains no mycobacterial antigen peptides We  
139 assessed the effects of stimulation by comparing gene expression in the TB1- and TB2-  
140 stimulated tubes versus the negative tube at visit 1, using paired t-tests. In the IGRA+ group,  
141 when TB1 tube samples were compared to the negative tube, 3578 transcripts were SDE,  
142 while 3217 transcripts were SDE in the TB2 tube samples vs. the negative tube samples (BH  
143 corrected p value < 0.05), 2495 of which overlapped with the TB1 comparison (Figure 2- figure  
144 supplement 1A and 1B; SDE transcripts listed in Supplementary File 2). No genes were found  
145 to be SDE for the TB1- vs TB2-stimulated samples comparison.

146

147 In the IGRA- healthy controls, 37 transcripts were SDE in the TB1-stimulated samples  
148 compared to the negative tubes at visit 1 whereas just four transcripts were SDE in the TB2-  
149 stimulated samples (BH corrected p value < 0.05) (Figure 2- figure supplement 1C and 1D;  
150 SDE transcripts listed in Supplementary File 3).

151

152

153 **Figure 2**

154 Volcano plots showing genes significantly differentially expressed between IGRA+  
155 and IGRA- individuals. Genes upregulated in IGRA+s with log<sub>2</sub>Foldchange (LFC) >1 and Benjamini-  
156 Hochberg adjusted p value <0.05 are shown in red. Genes downregulated in IGRA+ individuals with  
157 LFC <-1 and BH adjusted p value <0.05 are shown in blue. Genes with LFC >2.7 and <-1.7 are annotated  
158 with their gene symbols. Plots are shown for TB1-stimulated samples at Visit (V) 1 [A] and V2 [B] and  
159 TB2-stimulated samples at V1 [C] and V2 [D]

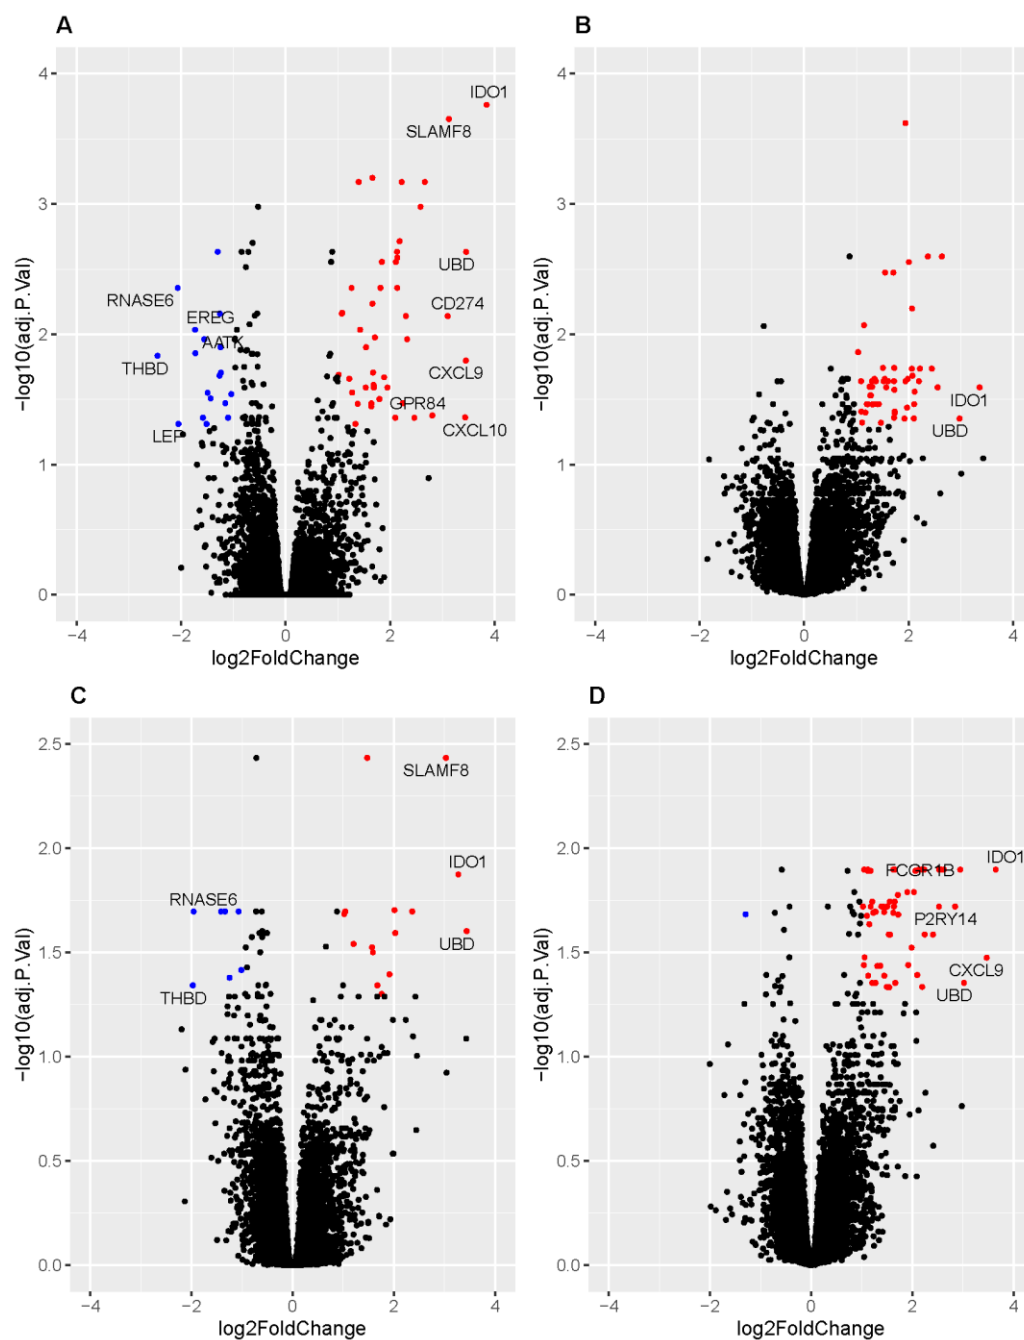

160



## 161 **Filtering the gene expression dataset**

162 Analyses were focused on the stimulated samples, as there had been no detectable  
163 differences between the IGRA+ and IGRA- participants in the unstimulated PAXgene samples.  
164 As described above, stimulation induced changes in gene expression in the IGRA- healthy  
165 controls, with a higher number of SDE genes observed with TB1-stimulation than TB2-  
166 stimulation, suggesting a greater non-specific effect independent of *Mtb* infection in the TB1  
167 stimulation. Therefore, we focused on the TB2-stimulated samples for the next stage of the  
168 analysis.

169  
170 The gene set was filtered to eliminate noise. Those genes that were lowly expressed or with  
171 extreme outlying values were removed, and of the remaining transcripts, those with the  
172 greatest variability between participants and over time were selected for the analysis, with  
173 X-transcripts SDE with gender and Y-chromosome transcripts removed. Through this process,  
174 a dataset with the “most variable genes” was generated for the TB2-stimulated samples (474  
175 transcripts, listed in Supplementary File 4).

176

## 177 **Clustering analysis of longitudinal gene expression**

178 We hypothesized that the IGRA+ group is heterogeneous, containing individuals that would  
179 demonstrate a transcriptomic response to PT (those with viable mycobacteria), and IGRA+  
180 individuals without viable mycobacteria, who would not demonstrate a transcriptomic  
181 response to PT and would more closely resemble the healthy control IGRA- group. To unmask  
182 the PT-specific transcriptomic responses, we sought to stratify the IGRA+ group of individuals  
183 in an agnostic way. We employed unsupervised clustering analysis of longitudinal gene  
184 expression in the 18 IGRA+ patients and the 4 IGRA- controls, aiming to identify IGRA+  
185 subgroups, using the most variable 474 transcripts in the TB2-stimulated dataset. The  
186 BClustLong package in ‘R’ [6] was utilized, which uses a linear mixed-effects framework to  
187 model the trajectory of genes over time and bases clustering on the regression coefficients  
188 obtained from all genes.

189

190 This longitudinal clustering analysis revealed two subgroups of IGRA+ participants. One  
191 subgroup of IGRA+s (IGRA+ subgroup A, N=12) clustered with the four healthy controls  
192 (Cluster 1), suggesting their gene expression over time was more similar to this *Mtb*-

193 unexposed IGRA- population than it was to the remaining IGRA+s (IGRA+ subgroup B, N=6)  
194 who formed cluster 2. There were no significant differences in age, gender, ethnicity, BCG  
195 vaccination status or the IGRA+ participants' TB contact history between clusters 1 and 2  
196 (Table 2).

197

### 198 **Longitudinal differential gene expression analysis**

199 In order to unravel the underlying blood transcriptomic differences between the two cluster  
200 groups generated by the unsupervised clustering, we performed longitudinal differential gene  
201 expression analysis using MaSigPro package in R [7]. MaSigPro uses a two-step regression  
202 strategy to firstly identify genes with significant temporal expression changes and then  
203 identify those genes which are significantly differentially expressed between groups.

204

205 Of the 474 transcripts in the dataset, 117 transcripts corresponding to 109 genes, were SDE  
206 over time between the two patient groups (with degrees of freedom=1 capturing linear  
207 trends, BH corrected p value < 0.05, listed in Supplementary File 5), while 2 of these genes  
208 had significant linear terms associated with time (*P2RY6*, *SLC2A3*). Setting the degrees of  
209 freedom to 2, 69 out of the 117 genes were SDE over time between the two cluster groups  
210 (BH corrected p value < 0.05, listed in Supplementary File 5), while 4 of these genes (*MSR1*,  
211 *MT1CP*, *IGHG3*, *IGHG1*) had significant linear and quadratic terms associated with time as  
212 well. In comparing cluster 1 vs. cluster 2, when one of the clusters is heterogeneous (IGRA+  
213 subgroup A plus IGRA- healthy controls), it is expected that some of the differences will be  
214 down to the IGRA+ subgroup B versus IGRA- and not the IGRA+ subgroup B vs IGRA+ subgroup  
215 A comparison.

216

217 These 109 genes largely encoded proteins with known immune system function. Around one  
218 quarter have been previously reported in transcriptomics studies comparing blood from TB  
219 patients with healthy controls (31 transcripts, 25 genes) or with other diseases (9 transcripts,  
220 7 genes) [8-14]; (Supplementary File 5).

221

222 **Table 2**

223 Characteristics of Cluster groups 1 and 2.

|                                                 |                    | BClustLong clustering group                                                                                                          |                                                         |         |
|-------------------------------------------------|--------------------|--------------------------------------------------------------------------------------------------------------------------------------|---------------------------------------------------------|---------|
|                                                 |                    | Cluster 1                                                                                                                            | Cluster 2                                               | p value |
| Number of participants                          |                    | 16                                                                                                                                   | 6                                                       | N/A     |
| Patient IDs                                     |                    | HC51<br>HC53<br>HC54<br>HC55<br>LTBI1<br>LTBI2<br>LTBI3<br>LTBI5<br>LTBI7<br>LTBI9<br>LTBI12<br>LTBI15<br>LTBI16<br>LTBI27<br>LTBI28 | LTBI6<br>LTBI10<br>LTBI14<br>LTBI22<br>LTBI23<br>LTBI30 | N/A     |
| Age in years: Median (IQR)                      |                    | 32.5 (24-41)                                                                                                                         | 33.5 (29-38)                                            | 0.6     |
| Gender                                          | Male               | 9 (56%)                                                                                                                              | 4 (66%)                                                 | 1       |
|                                                 | Female             | 7 (44%)                                                                                                                              | 2 (33%)                                                 |         |
| Confirmed recent exposure to DS-TB <sup>1</sup> | Yes                | 10 (83%)                                                                                                                             | 5 (83%)                                                 | 1       |
|                                                 | No                 | 2 (17%)                                                                                                                              | 1 (17%)                                                 |         |
| BCG                                             | Yes                | 10 (62%)                                                                                                                             | 6 (100%)                                                | 0.2     |
|                                                 | No                 | 4 (25%)                                                                                                                              | 0 (0%)                                                  |         |
|                                                 | Unknown            | 2 (13%)                                                                                                                              | 0 (0%)                                                  |         |
| Continent of Birth                              | Africa             | 3 (19%)                                                                                                                              | 1 (17%)                                                 | 0.2     |
|                                                 | Asia               | 1 (6%)                                                                                                                               | 3 (50%)                                                 |         |
|                                                 | Australasia        | 1 (6%)                                                                                                                               | 0 (0%)                                                  |         |
|                                                 | Europe             | 9 (56%)                                                                                                                              | 2 (33%)                                                 |         |
|                                                 | North America      | 1 (6%)                                                                                                                               | 0 (0%)                                                  |         |
|                                                 | South America      | 1 (6%)                                                                                                                               | 0 (0%)                                                  |         |
| Ethnicity                                       | Asian <sup>2</sup> | 4 (25%)                                                                                                                              | 3 (50%)                                                 | 0.7     |
|                                                 | Black <sup>3</sup> | 3 (19%)                                                                                                                              | 1 (17%)                                                 |         |
|                                                 | White <sup>4</sup> | 8 (50%)                                                                                                                              | 2 (33%)                                                 |         |
|                                                 | Other <sup>5</sup> | 1 (6%)                                                                                                                               | 0 (0%)                                                  |         |

224 <sup>1</sup>for IGRA+ participants only

225 <sup>2</sup>Includes Bengali, Hong Kong, Kurdish, Sri Lankan, Turkish; <sup>3</sup>Includes Black African; <sup>4</sup>Includes White

226 British, Polish, Romanian, White other; <sup>5</sup>Includes Latin American, Unknown

227

228 Coefficients obtained using MaSigPro were used to cluster significant genes with similar  
229 longitudinal expression patterns (Figure 3). Often the proteins contained within a gene set  
230 had similar function, such as the CXC chemokines CXCL9, 10 and 11 in gene set 2 which were  
231 more highly expressed in patient cluster 2 and increased at V2, and the pro-inflammatory NF-  
232  $\kappa$ B transcription factor-inducing proteins IFN $\gamma$ , IL-1R associated kinase 2 (IRAK2) and TNF  
233 superfamily member 15 (TNFSF15) in gene set 4, which were more highly expressed in patient  
234 cluster 2 and decreased through PT. BATF2, GCH1 and GBP3 all grouped in gene set 9, with  
235 consistently higher expression in patient cluster 2. Gene expression was higher in patient  
236 cluster 1 in only one gene set (gene set 3).

237

### 238 **Biological relevance of the significantly differentially expressed genes**

239 The biological relevance of the 117 transcripts significantly differentially expressed over time  
240 between the two patient cluster groups was investigated. Biological pathways analysis was  
241 performed using Reactome pathway knowledgebase [15], with 80/117 transcripts  
242 successfully mapping to the database. Eleven pathways had significant over-representation  
243 of transcripts within our dataset (BH corrected p value < 0.05; listed in Supplementary file 6):  
244 these were all related to the immune system and encompassed pathways related to  
245 chemokine receptor binding, cytokine signaling – including IL10, TNF and regulatory T cells,  
246 metal ion binding and Complement cascade activation. There were a further 39 pathways  
247 with borderline over-representation: these largely encompassed biological functions related  
248 to innate immunity, antimicrobial peptides, phagocytosis, intracellular infection, and further  
249 cytokine signaling and Complement activation pathways.

250

### 251 **Differing cellular responses to preventive therapy**

252 Relative cellular abundances were estimated from the gene expression data using CibersortX  
253 [16]. The estimated abundances of monocytes and lymphocytes were used to calculate the  
254 monocyte: lymphocyte ratio (MLR) for the two cluster groups at all three visits. At visits 1 and  
255 3, the MLRs were similar between Clusters 1 and 2. However, at Visit 2, they were higher in  
256 cluster 2 (median= 0.52) compared to cluster 1 (median= 0.29, p=0.03). This difference at Visit  
257 2 remained when the IGRA- healthy controls were removed from the analysis, with the MLR  
258

259 **Figure 3**

260 Longitudinal differential gene expression analysis between patient cluster groups 1 and 2 was  
 261 performed using the TB2-stimulated whole blood samples. With 1 degree of freedom, 117/474  
 262 transcripts were SDE over time and between cluster groups 1 and 2 (BH corrected p value < 0.05). The  
 263 coefficients obtained were used to group together significant genes with similar longitudinal  
 264 expression patterns. MaSigPro identified 9 gene groups. Plots of gene expression against time for  
 265 these gene groups are shown for patient cluster groups 1 (green) and 2 (blue). Lines join the median  
 266 expression values of the gene groups at each timepoint. The gene symbols are listed for each gene  
 267 group.

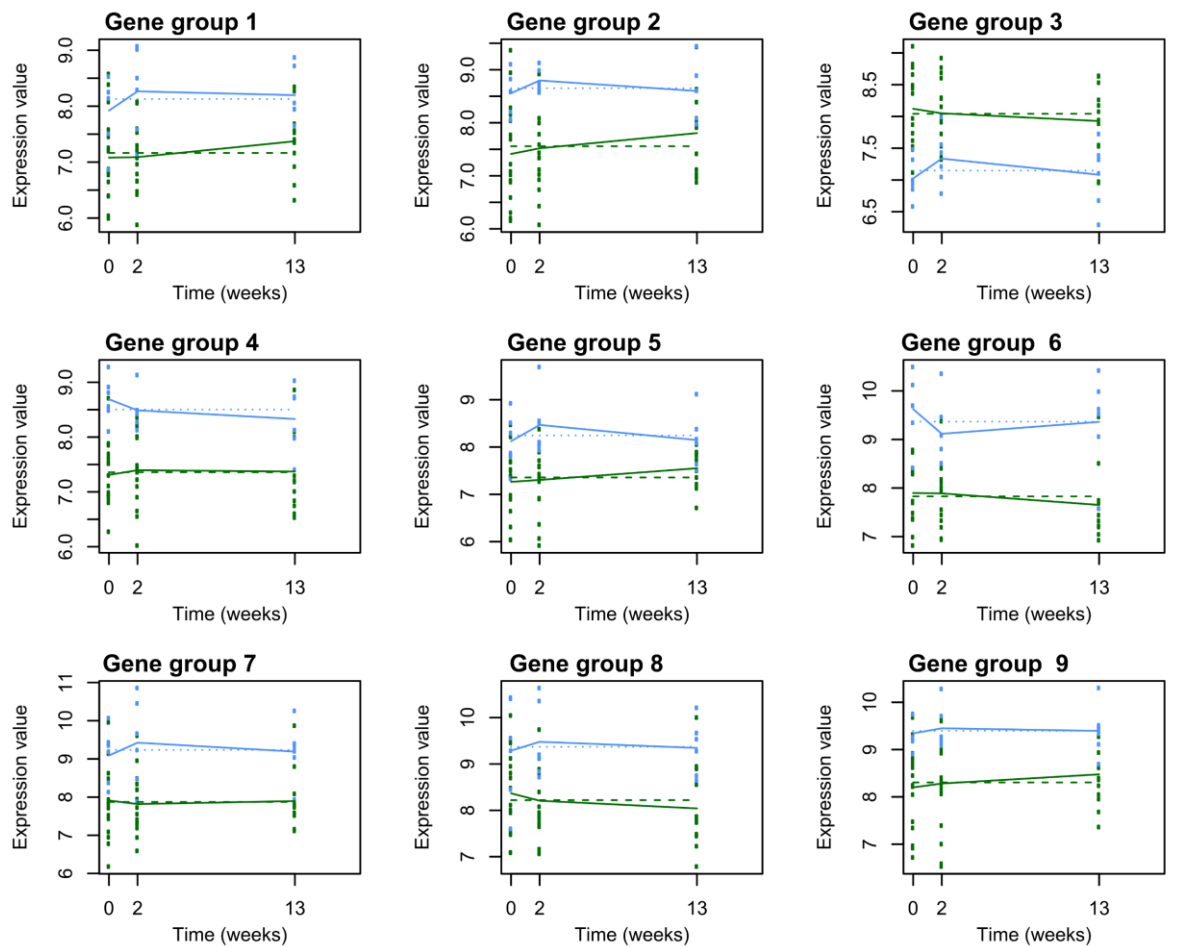

| Gene groups: |                                                                                                                                                              |
|--------------|--------------------------------------------------------------------------------------------------------------------------------------------------------------|
| 1:           | CCL8, CTSC, LILRB5, LINC00996, RETN, P2RY6, RGL1, SDSL                                                                                                       |
| 2:           | BATF3, CD38, CH25H, CISH, CXCL9, CXCL10, CXCL11, EBI3, EXOC3L4, GGT5, HLA-DQA1, IL2RA, LINC02528, PIR, PROCR, SCIMP, TNFRSF4, UBD                            |
| 3:           | ANKRD20A9P, CMTM2, CXCR2, HIF1A-AS3, HIST2H2B, KRT72, LEP, LOC100507006, LOC254896, NFXL1, RNASE6, SLC2A3, TMEM45A, TNFRSF10C, TNFRSF8, VCAN, XLC0_I2_005490 |
| 4:           | C3, DEFB1, EDN1, HLS4, IFNG, INHB4, IRAK2, GDF15, LINC02154, MFS2A, MIR155HG, NEURL3, OLR1, PDE4DIP, PHLDA2, PI3, SLPI, TNFSF15                              |
| 5:           | CCL7, CTSL, CTSLP4, CTSLP8, MSR1                                                                                                                             |
| 6:           | CCL3, CCL3L3, CCL4L2, GPR84, HBEGF, HSD11B1, IL1A, LAMB3, Lnc-EGR-3, LOC388780, MDGA1                                                                        |
| 7:           | LINC0109, MT1CP, MT1E, MT1G, MT1H, MT1M, MT1X                                                                                                                |
| 8:           | CCL18, CPNE5, IGHA2, IGHG1, IGHG3, IGHG4, IGJ, IGKV1-16, IGLC6, IGLL5, SMIM1                                                                                 |
| 9:           | BATF2, C11orf85, FLJ27255, GCH, GBP3, lnc-PIK3CG-4, LOC731424, MIR3945HG, SLAMF8                                                                             |

Cluster group 1 — (green line)  
 Cluster group 2 — (blue line)

268

269 **Figure 4**

270 Cibersortx was used to estimate the abundance of monocytes and lymphocytes in the TB2-stimulated  
271 whole blood samples at each visit, and the monocyte: lymphocyte ratio was calculated. (A) Boxplots  
272 showing the Monocyte: Lymphocyte ratios at Visits 1, 2 and 3 for IGRA- healthy controls and IGRA+  
273 groups A and B. NS denotes  $p > 0.05$ , \* denotes  $p \leq 0.05$ . Scatterplots showing the change in Monocyte:  
274 lymphocyte ratio over the time-course of the study period for (B) IGRA+ subgroup A and (C) IGRA+  
275 subgroup B, where Visit 1 is 0 weeks, Visit 2 is 2 weeks and Visit 3 is 13 weeks, with 90% confidence  
276 intervals shown.

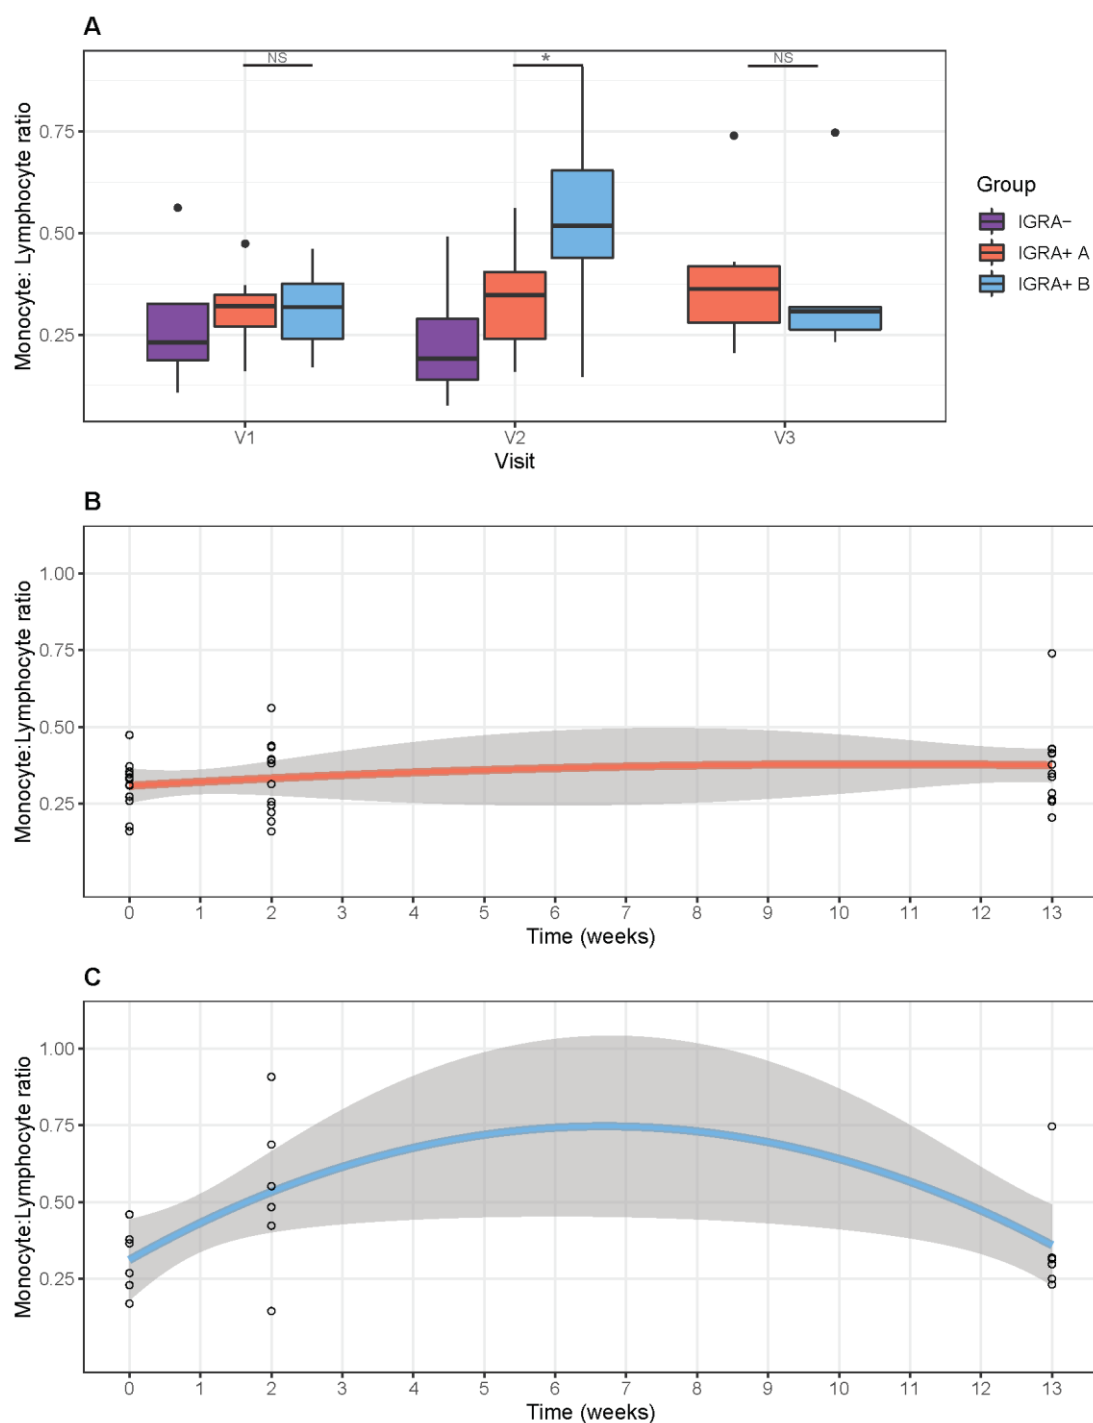

277

278 higher in IGRA+ subgroup B (median=0.52) compared to subgroup A (median=0.35,  $p=0.04$ )  
279 (Figure 4A).

280

281 Using a second-degree polynomial model, the MLR was found to change over the time-course  
282 of the study period in IGRA+ subgroup B, and was close to the threshold of significance (linear  
283 term  $p=0.07$ , quadratic term  $p=0.06$ ). This was not observed in IGRA+ subgroup A (linear term  
284  $p=0.6$ , quadratic term  $p=0.8$ ) (Figure 4B and C).

285

286 The relative abundances of other cell types including total monocytes, total lymphocytes,  
287 total CD4+ T cells and neutrophils were also observed to change with time in IGRA+ subgroup  
288 B and not subgroup A (Figure 4 –figure supplement 1).

289

## 290 **Discussion**

291

292 This analysis has demonstrated that IGRA+ participants could be stratified according to their  
293 whole blood transcriptome into two distinct populations, one of which clustered with IGRA-,  
294 tuberculosis (TB)-unexposed controls. This separation was not clearly discernible when the  
295 transcriptomes of participants were evaluated at baseline in unstimulated whole blood, but  
296 rather was unmasked by TB-specific peptide stimulation after 14 days of TB preventive  
297 therapy (PT).

298

299 We hypothesized that PT would mediate mycobacterial death in participants for whom IGRA  
300 positivity was attributable to ongoing viable *Mycobacterium tuberculosis* (*Mtb*) infection and  
301 that the resulting immunological response, detected as a whole blood transcriptomic  
302 readout, would differentiate such individuals from a group of IGRA+ participants in whom PT  
303 would have no anti-mycobacterial effect due to the absence of viable *Mtb*. Our agnostic  
304 clustering approach clustered all four IGRA- healthy controls with a subgroup of IGRA+s  
305 (IGRA+ A), which is strongly suggestive that if indeed these clusters do define *Mtb* viability  
306 status then the true latent tuberculosis infection (LTBI) participants lie within the other  
307 subgroup (IGRA+ B). The genes differentially expressed between the two clusters through PT  
308 were predominantly involved in the immune system, particularly related to intracellular

309 infection, inflammation, chemotaxis and cytokine signalling, indicating a biologically plausible  
310 specific response in the IGRA+ B subgroup.

311

312 Alternative explanations for the clear separation of these two groups were considered.  
313 Rifampicin has important antimicrobial effects against gram-positive organisms and can  
314 eliminate upper respiratory tract carriage of gram-negative organisms such as *Neisseria*  
315 *meningitidis* and *Haemophilus influenzae* within 2-4 days. The inclusion of  
316 rifampicin/isoniazid treated, IGRA-negative control participants was an attempt to capture  
317 and isolate any such non-mycobactericidal effect. In the absence of microbiological sampling  
318 and/or microbiome analysis we cannot entirely exclude the possibility that the separation of  
319 the groups is attributable to an effect completely unrelated to *Mtb* infection; however two  
320 factors which weigh against this alternative explanation are the low prevalence of *N.*  
321 *meningitidis* and *H. influenzae* carriage in this population (<10% combined) and the  
322 identification amongst the differentially expressed genes of several genes known to be  
323 associated with *Mtb* response pathways. The changes through PT overlapped with reported  
324 changes in blood transcriptome during treatment of active TB cases [17, 18]. The monocyte-  
325 to-lymphocyte ratio transiently increased only in the IGRA+ B subgroup: this ratio has been  
326 linked with TB disease susceptibility and blood transcriptomes [19]. The prevalence of  
327 carriage of non-tuberculous mycobacteria in this London-resident population would also be  
328 expected to be very low. Finally, we were concerned to exclude all possible artefactual  
329 explanations related to sample handling and found no effect association with study site, time  
330 to sample processing, study personnel or date of enrolment.

331

332 We contend that interferon gamma release assays (IGRA) and tuberculin skin tests (TST) are  
333 mis-represented as tests for LTBI, a term which infers viability of *Mtb* with potential to cause  
334 future reactivation disease. We believe that the observation that 90% of individuals with  
335 positive testing by IGRA/TST do not develop TB disease is more likely to reflect low frequency  
336 of persistent viable (“reactivate-able”) infection than low frequency of breakout of *Mtb*  
337 replication from long-term immunological control. The empirical evidence that we present in  
338 support of this contention is consistent with recent re-evaluations of epidemiological data  
339 which suggest that (1) duration of *Mtb* infection viability is likely to be much shorter than  
340 previously believed [20] and that (2) reactivation rates in IGRA or TST positive individuals



341 unprotected by PT undergoing immunosuppressive therapy are much lower than would be  
342 expected if such testing represented infection truly capable of reactivation [21]. Emerging  
343 mathematical modelling outputs add weight to this paradigm shift, suggesting that a  
344 significant proportion of *Mtb*-infected individuals achieve self-clearance, leaving a much  
345 smaller population with persisting viable *Mtb* infection than previously assumed [22]. Finally,  
346 a precedent for lasting anti-mycobacterial immunological reactivity in the absence of  
347 bacterial viability already exists in the form of erythema nodosum leprosum, type II reactions  
348 to persistent *M. leprae* antigens which are known to occur years after mycobacterial cure.

349  
350 These blood transcriptional responses to PT suggest that around one third of our IGRA+ study  
351 participants had true (viable) LTBI. This proportion is predicted to be lower with increasing  
352 remoteness in time since exposure [20]. The implications for national and global estimates of  
353 LTBI prevalence that rely upon IGRA/ TST data are clear and suggest a large overestimation of  
354 the size of the global reservoir of potentially reactivatable latent infection; we contend that  
355 such data should in future be presented as prevalence of tuberculin sensitivity and that the  
356 term LTBI should be used more judiciously. Since all incident reactivation arises from the true  
357 LTBI pool, the incidence rate in this subgroup of all IGRA positives will be considerably higher  
358 than, for example, the 0.6 per 100 person-years seen in the placebo arm of a recent vaccine  
359 trial [23]. The development of tools and strategies to readily identify this true LTBI subgroup  
360 would facilitate more efficient targeting of interventions to interrupt reactivation and would  
361 accelerate evaluation of novel interventions because the sample size required for future  
362 vaccine trials and trials of preventive therapy would be considerably reduced. Evaluations of  
363 risk factors associated with infection, premised on the use of IGRA/TST to define infection,  
364 have likely been using a very imperfect endpoint with the associated high likelihood of  
365 misclassification error.

366  
367 The temporal dynamics of the transcriptomic changes are such that evidence of a response  
368 can be detected as early as 2 weeks into PT. This raises the possibility of a ‘treat and test’  
369 approach to PT wherein the absence of a specific change in a biomarker (or biomarker profile)  
370 at an early time point, say 2 weeks into treatment, could be interpreted as an indication that  
371 further treatment will have no effect and can then be discontinued. Recent TB host gene

372 expression studies have shown that biomarker signatures can be shrunk to small sets with the  
373 potential to be implemented as diagnostic or prognostic tests in the field [24-26].

374

375 This study had a relatively modest number of participants. Our results based on the  
376 transcriptional profiles after PT therapy should be studied in larger prospective cohorts with  
377 well-defined clinical outcomes and long term follow up. Sequential transcriptomic and cell  
378 count differential testing on a larger study population (including children), with a variety of  
379 exposure histories and diverse PT regimens (including those under investigation for  
380 multidrug-resistant LTBI) will help to elucidate the array of responses encountered. The hunt  
381 for predictors of future disease amongst TB- exposed individuals has previously been directed  
382 towards identification of biomarkers indicating increased risk, an approach that risks dismissal  
383 of future changes in the host environment which it might not be possible to anticipate (e.g.  
384 transplant immunosuppression). By removing from the pool of *Mtb*-sensitized participants  
385 (IGRA+ or TST+) a significant proportion for whom reactivation is biologically impossible  
386 (because no viable *Mtb* infection remains), the scale of the prevention challenge is drastically  
387 reduced and a more efficient targeted and nuanced approach can be considered.

388

389 Validation of this transcriptomic signature in ongoing trials of PT in which defined secondary  
390 cases are identified is now a priority. Important implications of a test that can distinguish  
391 IGRA+ or TST+ *Mtb* sensitized individuals at zero risk of progression/reactivation include  
392 drastic reevaluation of the global burden of LTBI, stratification of preventive therapy and  
393 post-exposure vaccine efficacy, higher resolution targeting of LTBI preventive therapy,  
394 potential use as a biomarker for efficacy evaluation of novel PT regimens for drug-susceptible  
395 and drug-resistant-TB, and PT test of cure.

396

397 Individuals with immunological memory of a prior encounter with *Mtb* (commonly referred  
398 to as LTBI) who are treated with PT demonstrate two different phenotypes of transcriptomic  
399 response. We propose that the clear responders are those who had truly viable latent *Mtb*  
400 infection, and that the minimal responders, in common with the IGRA-negative, previously  
401 unexposed healthy controls, had no viable *Mtb* organisms and were therefore not truly  
402 latently TB infected.

403

## 404 **Materials and Methods**

405

### 406 **Participants**

407 Study participants were recruited from National Health Service (NHS) tuberculosis (TB)  
408 outpatient clinics in London (Whittington Health NHS Trust, Royal Free London NHS  
409 Foundation Trust, Barts Health NHS Trust, Homerton University Hospital NHS Foundation  
410 Trust). Healthy controls were recruited from the London School of Hygiene and Tropical  
411 Medicine.

412

413 Participants were recruited who were aged 18 years and above, had positive Interferon  
414 Gamma Release Assay (IGRA) (performed by the local hospital laboratories, using the  
415 QuantiFERON-TB Gold In-tube assay [Qiagen, Manchester, UK]), with known exposure to an  
416 index person with isoniazid and rifampicin susceptible pulmonary TB (unconfirmed for three  
417 individuals) and who planned to initiate a 12-week course of combined rifampicin/  
418 isoniazid (RH) as preventive therapy (once daily rifampicin 600 mg/ isoniazid 300 mg as Rifinah) plus  
419 once daily pyridoxine 10 mg. Adult volunteers aged 18 years and above were recruited as  
420 healthy control participants.

421

422 Once consented, demographic information, TB exposure history, and medical history were  
423 recorded on a data capture sheet and testing for human immunodeficiency virus (HIV) was  
424 performed. Healthy volunteers additionally underwent IGRA testing (performed using the  
425 QuantiFERON-TB Gold In-tube assay according to the manufacturer's recommendations) and  
426 were excluded if they were found to be IGRA+. Individuals were excluded if they had a prior  
427 history of TB infection, of having taken anti-TB treatment or exposure to drug-resistant TB.  
428 Participants who were pregnant, breastfeeding or trying to conceive, those with  
429 immunosuppressive disorders including HIV and those who had taken immunosuppressant  
430 medication in the preceding six months were also excluded. Healthy control participants  
431 reporting prior exposure to TB were also excluded.

432

433 Healthy controls were given a two-week course of RH (once daily rifampicin 600 mg/  
434 isoniazid 300 mg as Rifinah) plus once daily pyridoxine 10 mg.

435

436 Blood samples were collected from all participants at baseline (V1) and 2 weeks after initiating  
437 RH (V2), with an additional sample point in IGRA+ participants within 6 weeks of completion  
438 of the 12-week course of treatment (V3). At all sampling timepoints, all participants were  
439 asked about their adherence to treatment, and 2.5 ml whole blood was collected in a PAXgene  
440 blood RNA tube (PreAnalytiX GmbH, Hombrechtikon, Switzerland) for RNA expression  
441 analysis and a Lithium heparin tube (Becton Dickinson, Berkshire, UK) for subsequent  
442 stimulation assays. The PAXgene tubes were frozen within 4 hours of collection.

443

444 The study procedures and protocol were approved by City & East NHS Research Ethics  
445 Committee, London (reference 16/LO/1206) and the London School of Hygiene and Tropical  
446 Medicine Research Ethics Committee (reference 11603). Written informed consent was given  
447 by all participants before inclusion in the study.

448

#### 449 **Stimulation of whole blood**

450 Stimulation was performed using QuantiFERON-TB Gold Plus In-tube Assay (QFT-TB Plus)  
451 (Qiagen). Within four hours of collection, 1 ml of blood was transferred from the lithium  
452 heparin tube to each of the four QFT-TB Plus tubes – TB1 antigen, TB2 antigen (both  
453 containing peptides from ESAT-6 and CFP-10 antigens), mitogen positive control and  
454 (unstimulated) negative control – the tubes were gently shaken to dissolve the lyophilized  
455 peptides in the blood. The QFT-TB Plus tubes were immediately incubated upright at 37°C for  
456 22 -24 hours. After incubation, the blood was transferred into a 1.5 ml microcentrifuge tube  
457 and centrifuged for 15 minutes at 3000 RCF(g). Supernatants were removed and the  
458 remaining cell pellet (500 µl) was transferred into a 15 ml tube containing 2.5 ml RNeasy<sup>®</sup>  
459 Cell Reagent (Qiagen). The cells were resuspended by vortexing, and incubated for 2 hours  
460 for complete cell lysis before freezing at -80°C.

461

#### 462 **Peripheral blood RNA expression by microarray**

463 Total RNA was extracted from the PAXgene tubes using the PAXgene Blood miRNA Kit  
464 (Qiagen), and from the QFT-TB Plus stimulated samples, which had been lysed in RNeasy<sup>®</sup>,  
465 using the RNeasy mini kit (Qiagen), according to the manufacturer's instructions,

466 incorporating on-column DNase digestion. Globin depletion was performed using the  
467 GLOBINclear Kit (ThermoFisher), quantified by Nanodrop and the quality was assessed using  
468 an Agilent Bioanalyzer (Agilent, Cheshire, UK. The two-color low input Quick Amp Labelling  
469 kit (Agilent) was used to Cy3- or Cy5-fluorescently label cRNA samples, which were then  
470 hybridized to SurePrint G3 Human Gene Expression 60K GeneChip microarrays (Agilent)  
471 according to the manufacturer's instructions. Hybridization intensity was quantified via a  
472 SureScan Microarray Scanner (Agilent). Microarray data are deposited at Gene Expression  
473 Omnibus, Series GSE153342.

474

475 Individual channel intensities from the GeneChip data were extracted independently and  
476 analysed as separate observations [27].

477

#### 478 **Statistical analyses**

479 Clinical data were analysed using 'R' Language and Environment for Statistical Computing  
480 3.5.2. Fishers, Chi-squared and Kruskal Wallis tests of significance were used for categorical  
481 data. Mann-Whitney U tests of significance were used for continuous data.

482

483 Expression data were analysed using 'R' Language and Environment for Statistical Computing  
484 3.5.2. Pre-processing, log-2 transformation and normalisation were performed using the Agilp  
485 package [28]. Microarrays were run using two batches of microarray slides and Principal  
486 Component Analysis identified an associated batch effect. Batch correction was performed  
487 using the COmBat function in the Surrogate Variable Analysis (sva) package in R [29, 30]. To  
488 minimise the potential influence of batch correction on subsequent clustering analyses, no  
489 reference batch was used and independent COmBat-corrections were performed for each  
490 dataset of interest (individual PAXgene, TB1 and TB2 tube datasets and a combined TB1/ TB2/  
491 negative tube dataset). Post-Combat correction PCA plots were undertaken to confirm the  
492 removal of the batch effect and identify outliers (Figure 1– Figure supplements 1 and 2).

493

494 Differential gene expression analysis was performed using the limma package in R [4] which  
495 uses linear models. Where paired samples were available and analysis was relevant, paired t-  
496 tests were performed, with this being stated in the results. Adjustment for false discovery

497 rate was performed using Benjamini-Hochberg (BH) correction with a significance level of  
498 adjusted p-value <0.05.

499

500 Prior to longitudinal analyses, the gene expression set was filtered to remove noise. Lowly  
501 expressed transcripts for which expression values did not exceed a value of 6 for any of the  
502 samples, were removed. Transcripts with extreme outlying values were removed, which were  
503 defined as values < (Quartile1 – [3\* Inter-Quartile Range]) or > (Quartile3 + [3 \* Inter-Quartile  
504 Range]). Transcripts with the greatest temporal and interpersonal variability were then  
505 selected based on their variance, with those transcripts with variance >0.1 taken forwards to  
506 the longitudinal analysis. X-chromosome transcripts which were significantly differentially  
507 expressed with gender at V1, V2 and/ or V3 were identified using linear models in limma (BH  
508 corrected p value < 0.05) and were excluded, as were Y-chromosome transcripts.

509

510 Unsupervised longitudinal clustering analyses were performed using the BClustLong package  
511 in 'R' [31], which uses a Dirichlet process mixed model for clustering longitudinal gene  
512 expression data. A linear mixed-effects framework is used to model the trajectory of genes  
513 over time and bases clustering on the regression coefficients obtained from all genes. 500  
514 iterations were run (thinning by 2, so 1000 iterations in total).

515

516 Longitudinal differential gene expression analyses were performed using the MaSigPro  
517 package in R [7]. MaSigPro follows a two steps regression strategy to find genes with  
518 significant temporal expression changes and significant differences between groups.  
519 Coefficients obtained in the second regression model are used to then cluster together  
520 significant genes with similar expression patterns. Adjustment for false discovery rate was  
521 performed using BH correction with a significance level of adjusted p-value <0.05. Given the  
522 three timepoints from the IGRA+ individuals and the two timepoints from the healthy control  
523 groups, we employed both quadratic and linear approaches to account for all the potential  
524 curve shapes in the gene expression data.

525

526 Estimations of relative cellular abundances were calculated from the normalised full gene  
527 expression matrix (58,201 gene probes) using the CibersortX [16], which uses gene expression  
528 data to deconvolve mixed cell populations. We used the LM22 [32] leukocyte gene signature

529 matrix as reference, that comprises 22 different immune cell types, and ran 1,000  
530 permutations. Total monocyte fraction was calculated as the sum of the fractions of  
531 monocytes, macrophages and dendritic cells. Total lymphocyte fraction was calculated as the  
532 sum of B cells, Plasma cells, CD8+ T cells, CD4+ T cells, Helper follicular T cells, Regulatory T  
533 cells, Gamma delta T cells, and NK cells. A polynomial model (degrees of freedom = 2) was  
534 fitted in R to estimate relationships between the monocyte: lymphocyte ratio and time, in  
535 IGRA+ subgroups A and B.

536

### 537 **Acknowledgements**

538

539 The authors wish to thank the patients and volunteers who participated in the study. We also  
540 thank the clinical staff at Barts Health NHS Trust, Homerton University Hospital Foundation  
541 Trust and TB Service North Central London, in particular Heinke Kunst (Barts Health NHS  
542 Trust), Graham Bothamley (Homerton University Hospital Foundation Trust) and Marc Lipman  
543 (TB Service North Central London). The authors also wish to thank the research nurses who  
544 assisted with this study, including Victoria Dean and Michelle Berin (University College  
545 London) and Nirmala Ghimire (Barts Health) and Ortensia Vito (Imperial College London) for  
546 help with data analysis.

547

548 This work was funded by a British Infection Association Small Project Research Grant (2016)  
549 and a Rosetrees Trust Seed Corn Award (# JS15 / M660). C.B. was funded by an Academic  
550 Clinical Fellowship from the National Institute for Health Research (NIHR) (ACF-2012-18-008)  
551 and currently receives support from an Imperial 4i Wellcome Trust/ NIHR Imperial BRC Clinical  
552 PhD Fellowship. M.K. receives support from the NIHR Imperial College BRC and the Wellcome  
553 Trust (Sir Henry Wellcome Fellowship grant no. 206508/Z/17/Z). JC receives support from the  
554 Medical Research Council Newton Fund (#MR/P017568/1).

555

### 556 **Competing Interests**

557

558 No competing interests are declared by the authors.

559



## 560 References

561

- 562 1. World Health Organisation. *Latent tuberculosis infection: updated and consolidated*  
563 *guidelines for programmatic management*. 2018: Geneva.
- 564 2. Esmail, H., C.E. Barry, 3rd, D.B. Young, and R.J. Wilkinson, *The ongoing challenge of*  
565 *latent tuberculosis*. *Philos Trans R Soc Lond B Biol Sci*, 2014. 369(1645): p. 20130437.
- 566 3. Whalen, C.C., J.L. Johnson, A. Okwera, D.L. Hom, R. Huebner, P. Mugenyi, R.D.  
567 Mugerwa, and J.J. Ellner, *A trial of three regimens to prevent tuberculosis in Ugandan*  
568 *adults infected with the human immunodeficiency virus. Uganda-Case Western*  
569 *Reserve University Research Collaboration*. *N Engl J Med*, 1997. 337(12): p. 801-8.
- 570 4. Ritchie, M.E., B. Phipson, D. Wu, Y. Hu, C.W. Law, W. Shi, and G.K. Smyth, *limma*  
571 *powers differential expression analyses for RNA-sequencing and microarray studies*.  
572 *Nucleic Acids Res*, 2015. 43(7): p. e47.
- 573 5. Petruccioli, E., T. Chiacchio, I. Pepponi, V. Vanini, R. Urso, G. Cuzzi, L. Barcellini, D.M.  
574 Cirillo, F. Palmieri, G. Ippolito, and D. Goletti, *First characterization of the CD4 and CD8*  
575 *T-cell responses to QuantiFERON-TB Plus*. *J Infect*, 2016. 73(6): p. 588-597.
- 576 6. Sun, J., J.D. Herazo-Maya, N. Kaminski, H. Zhao, and J.L. Warren, *A Dirichlet process*  
577 *mixture model for clustering longitudinal gene expression data*. *Stat Med*, 2017.  
578 36(22): p. 3495-3506.
- 579 7. Conesa, A. and M.J. Nueda. *maSigPro: Significant Gene Expression Profile Differences*  
580 *in Time Course Gene Expression Data*. *R package version 1.54.0*. 2018; Available from:  
581 <http://bioinfo.cipf.es/>.
- 582 8. Anderson, S.T., M. Kaforou, A.J. Brent, V.J. Wright, C.M. Banwell, G. Chagaluka, A.C.  
583 Crampin, H.M. Dockrell, N. French, M.S. Hamilton, M.L. Hibberd, F. Kern, P.R.  
584 Langford, L. Ling, R. Mlotha, T.H. Ottenhoff, S. Pienaar, V. Pillay, J.A. Scott, H. Twahir,  
585 R.J. Wilkinson, L.J. Coin, R.S. Heyderman, M. Levin, B. Eley, I. Consortium, and K.T.S.  
586 Group, *Diagnosis of childhood tuberculosis and host RNA expression in Africa*. *N Engl J*  
587 *Med*, 2014. 370(18): p. 1712-23.
- 588 9. Berry, M.P., C.M. Graham, F.W. McNab, Z. Xu, S.A. Bloch, T. Oni, K.A. Wilkinson, R.  
589 Banchereau, J. Skinner, R.J. Wilkinson, C. Quinn, D. Blankenship, R. Dhawan, J.J. Cush,  
590 A. Mejias, O. Ramilo, O.M. Kon, V. Pascual, J. Banchereau, D. Chaussabel, and A.  
591 O'Garra, *An interferon-inducible neutrophil-driven blood transcriptional signature in*  
592 *human tuberculosis*. *Nature*, 2010. 466(7309): p. 973-7.
- 593 10. Blankley, S., C.M. Graham, J. Turner, M.P. Berry, C.I. Bloom, Z. Xu, V. Pascual, J.  
594 Banchereau, D. Chaussabel, R. Breen, G. Santis, D.M. Blankenship, M. Lipman, and A.  
595 O'Garra, *The Transcriptional Signature of Active Tuberculosis Reflects Symptom Status*  
596 *in Extra-Pulmonary and Pulmonary Tuberculosis*. *PLoS One*, 2016. 11(10): p. e0162220.
- 597 11. Bloom, C.I., C.M. Graham, M.P. Berry, F. Rozakeas, P.S. Redford, Y. Wang, Z. Xu, K.A.  
598 Wilkinson, R.J. Wilkinson, Y. Kendrick, G. Devouassoux, T. Ferry, M. Miyara, D. Bouvry,  
599 V. Dominique, G. Gorochov, D. Blankenship, M. Saadatian, P. Vanhems, H. Beynon, R.  
600 Vancheeswaran, M. Wickremasinghe, D. Chaussabel, J. Banchereau, V. Pascual, L.P.  
601 Ho, M. Lipman, and A. O'Garra, *Transcriptional blood signatures distinguish pulmonary*  
602 *tuberculosis, pulmonary sarcoidosis, pneumonias and lung cancers*. *PLoS One*, 2013.  
603 8(8): p. e70630.
- 604 12. Kaforou, M., V.J. Wright, T. Oni, N. French, S.T. Anderson, N. Bangani, C.M. Banwell,  
605 A.J. Brent, A.C. Crampin, H.M. Dockrell, B. Eley, R.S. Heyderman, M.L. Hibberd, F. Kern,



- 606 P.R. Langford, L. Ling, M. Mendelson, T.H. Ottenhoff, F. Zgambo, R.J. Wilkinson, L.J.  
607 Coin, and M. Levin, *Detection of tuberculosis in HIV-infected and -uninfected African*  
608 *adults using whole blood RNA expression signatures: a case-control study*. PLoS Med,  
609 2013. 10(10): p. e1001538.
- 610 13. Maertzdorf, J., J. Weiner, 3rd, H.J. Mollenkopf, T.B. Network, T. Bauer, A. Prasse, J.  
611 Muller-Quernheim, and S.H. Kaufmann, *Common patterns and disease-related*  
612 *signatures in tuberculosis and sarcoidosis*. Proc Natl Acad Sci U S A, 2012. 109(20): p.  
613 7853-8.
- 614 14. Ottenhoff, T.H., R.H. Dass, N. Yang, M.M. Zhang, H.E. Wong, E. Sahiratmadja, C.C. Khor,  
615 B. Alisjahbana, R. van Crevel, S. Marzuki, M. Seielstad, E. van de Vosse, and M.L.  
616 Hibberd, *Genome-wide expression profiling identifies type 1 interferon response*  
617 *pathways in active tuberculosis*. PLoS One, 2012. 7(9): p. e45839.
- 618 15. Jassal, B., L. Matthews, G. Viteri, C. Gong, P. Lorente, A. Fabregat, K. Sidiropoulos, J.  
619 Cook, M. Gillespie, R. Haw, F. Loney, B. May, M. Milacic, K. Rothfels, C. Sevilla, V.  
620 Shamovsky, S. Shorsler, T. Varusai, J. Weiser, G. Wu, L. Stein, H. Hermjakob, and P.  
621 D'Eustachio, *The reactome pathway knowledgebase*. Nucleic Acids Res, 2020. 48(D1):  
622 p. D498-D503.
- 623 16. Newman, A.M., C.B. Steen, C.L. Liu, A.J. Gentles, A.A. Chaudhuri, F. Scherer, M.S.  
624 Khodadoust, M.S. Esfahani, B.A. Luca, D. Steiner, M. Diehn, and A.A. Alizadeh,  
625 *Determining cell type abundance and expression from bulk tissues with digital*  
626 *cytometry*. Nat Biotechnol, 2019. 37(7): p. 773-782.
- 627 17. Bloom, C.I., C.M. Graham, M.P. Berry, K.A. Wilkinson, T. Oni, F. Rozakeas, Z. Xu, J.  
628 Rossello-Urgell, D. Chaussabel, J. Banchereau, V. Pascual, M. Lipman, R.J. Wilkinson,  
629 and A. O'Garra, *Detectable changes in the blood transcriptome are present after two*  
630 *weeks of antituberculosis therapy*. PLoS One, 2012. 7(10): p. e46191.
- 631 18. Cliff, J.M., J.S. Lee, N. Constantinou, J.E. Cho, T.G. Clark, K. Ronacher, E.C. King, P.T.  
632 Lukey, K. Duncan, P.D. Van Helden, G. Walzl, and H.M. Dockrell, *Distinct phases of*  
633 *blood gene expression pattern through tuberculosis treatment reflect modulation of*  
634 *the humoral immune response*. J Infect Dis, 2013. 207(1): p. 18-29.
- 635 19. Naranbhai, V., H.A. Fletcher, R. Tanner, M.K. O'Shea, H. McShane, B.P. Fairfax, J.C.  
636 Knight, and A.V. Hill, *Distinct Transcriptional and Anti-Mycobacterial Profiles of*  
637 *Peripheral Blood Monocytes Dependent on the Ratio of Monocytes: Lymphocytes*.  
638 EBioMedicine, 2015. 2(11): p. 1619-26.
- 639 20. Behr, M.A., P.H. Edelstein, and L. Ramakrishnan, *Revisiting the timetable of*  
640 *tuberculosis*. BMJ, 2018. 362: p. k2738.
- 641 21. Behr, M.A., P.H. Edelstein, and L. Ramakrishnan, *Is Mycobacterium tuberculosis*  
642 *infection life long?* BMJ, 2019. 367: p. l5770.
- 643 22. Emery, J.C., A.S. Richards, K.D. Dale, C.F. McQuaid, R.G. White, D. J.T., and R.M.G.J.  
644 Houben. *Self-clearance of Mycobacterium tuberculosis infection: implications for*  
645 *lifetime risk and population at-risk of tuberculosis disease* [Poster presentation]. 50th  
646 Union World Conference on Lung Health, 2019 Oct 30- Nov 2. Hyderabad, India.
- 647 23. Tait, D.R., M. Hatherill, O. Van Der Meeren, A.M. Ginsberg, E. Van Brakel, B. Salaun,  
648 T.J. Scriba, E.J. Akite, H.M. Ayles, A. Bollaerts, M.A. Demoitie, A. Diacon, T.G. Evans, P.  
649 Gillard, E. Hellstrom, J.C. Innes, M. Lempicki, M. Malahleha, N. Martinson, D. Mesia  
650 Vela, M. Muyoyeta, V. Nduba, T.G. Pascal, M. Tameris, F. Thienemann, R.J. Wilkinson,  
651 and F. Roman, *Final Analysis of a Trial of M72/AS01E Vaccine to Prevent Tuberculosis*.  
652 N Engl J Med, 2019. 381(25): p. 2429-2439.

- 653 24. Roe, J.K., N. Thomas, E. Gil, K. Best, E. Tsaliki, S. Morris-Jones, S. Stafford, N. Simpson,  
654 K.D. Witt, B. Chain, R.F. Miller, A. Martineau, and M. Noursadeghi, *Blood*  
655 *transcriptomic diagnosis of pulmonary and extrapulmonary tuberculosis*. JCI Insight,  
656 2016. 1(16): p. e87238.
- 657 25. Suliman, S., E. Thompson, J. Sutherland, J. Weiner Rd, M.O.C. Ota, S. Shankar, A. Penn-  
658 Nicholson, B. Thiel, M. Erasmus, J. Maertzdorf, F.J. Duffy, P.C. Hill, E.J. Hughes, K.  
659 Stanley, K. Downing, M.L. Fisher, J. Valvo, S.K. Parida, G. van der Spuy, G. Tromp, I.M.O.  
660 Adetifa, S. Donkor, R. Howe, H. Mayanja-Kizza, W.H. Boom, H. Dockrell, T.H.M.  
661 Ottenhoff, M. Hatherill, A. Aderem, W.A. Hanekom, T.J. Scriba, S.H. Kaufmann, D.E.  
662 Zak, G. Walzl, G.C. and the, and A.C.S.c.s. groups, *Four-gene Pan-African Blood*  
663 *Signature Predicts Progression to Tuberculosis*. Am J Respir Crit Care Med, 2018.
- 664 26. Sweeney, T.E., L. Braviak, C.M. Tato, and P. Khatri, *Genome-wide expression for*  
665 *diagnosis of pulmonary tuberculosis: a multicohort analysis*. Lancet Respir Med, 2016.  
666 4(3): p. 213-24.
- 667 27. Chain, B., H. Bowen, J. Hammond, W. Posch, J. Rasaiyaah, J. Tsang, and M.  
668 Noursadeghi, *Error, reproducibility and sensitivity: a pipeline for data processing of*  
669 *Agilent oligonucleotide expression arrays*. BMC Bioinformatics, 2010. 11: p. 344.
- 670 28. Chain, B. *agilp: Agilent expression array processing package. R package version 3.14.0.*  
671 2018; Available from:  
672 <http://bioconductor.org/packages/release/bioc/html/agilp.html>.
- 673 29. Johnson, W.E., C. Li, and A. Rabinovic, *Adjusting batch effects in microarray expression*  
674 *data using empirical Bayes methods*. Biostatistics, 2007. 8(1): p. 118-27.
- 675 30. Leek JT, Johnson WE, Parker HS, Fertig EJ, Jaffe AE, Storey JD, Zhang Y, and T. LC. *sva:*  
676 *Surrogate Variable Analysis. R package version 3.34.0.* . 2019; Available from:  
677 <https://bioconductor.org/packages/release/bioc/html/sva.html>.
- 678 31. Sun, J., J.D. Herazo-Maya, N. Kaminski, H. Zhao, and J.L. Warren. *BClustLonG: A*  
679 *Dirichlet Process Mixture Model for Clustering Longitudinal Gene*  
680 *Expression Data. R package version 0.1.2.* 2017; Available from: [https://CRAN.R-](https://CRAN.R-project.org/package=BClustLonG)  
681 [project.org/package=BClustLonG](https://CRAN.R-project.org/package=BClustLonG).
- 682 32. Newman, A.M., C.L. Liu, M.R. Green, A.J. Gentles, W. Feng, Y. Xu, C.D. Hoang, M.  
683 Diehn, and A.A. Alizadeh, *Robust enumeration of cell subsets from tissue expression*  
684 *profiles*. Nat Methods, 2015. 12(5): p. 453-7.

686

687

688 **Supplementary Data**

689

690 **Supplementary Figures**

691

692 **Figure 1- figure supplement 1**

693 Principle component analyses (PCA) of the gene expression sets were performed. Plots showing  
694 dimensions 1 and 2 of the PCA of the PAXgene samples (A) and the stimulated samples (B) before  
695 ComBat correction. In the stimulated samples, healthy control (HC52) was an outlier in dimensions 1  
696 and 2 (circled) and this persisted after batch correction (not shown), so HC52 was excluded from the  
697 subsequent analyses.

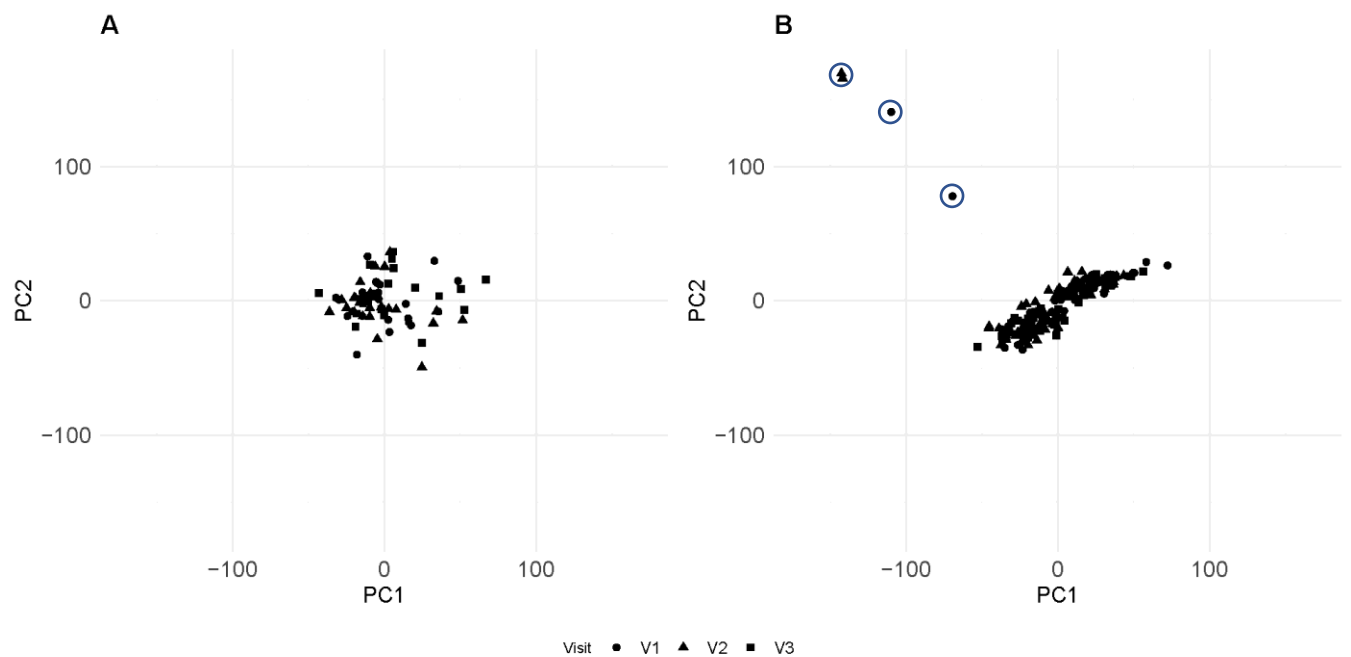

698

699

700

701

702

703

704

705

706

707

708

709 **Figure 1- figure supplement 2**

710 Gene expression data from 18 IGRA+ and 4 IGRA- participants were included in the final analyses.

711 Principle component analyses (PCA) of the gene expression sets were performed before and after

712 batch correction with ComBat. Plots showing dimensions 1 and 2 of the PCA of the PAXgene tube

713 samples before (A) and after ComBat (B); all stimulated samples (TB1, TB2 and Negative) before (C, D)

714 and after ComBat (E, F) with C and E showing batch differentiation and D and F showing tube

715 differentiation; TB1 samples before (G) and after Combat (H); TB2 samples before (I) and after Combat

716 (J). Batch, visit, IGRA status and QuantiFERON TB Gold plus tube are provided.

717

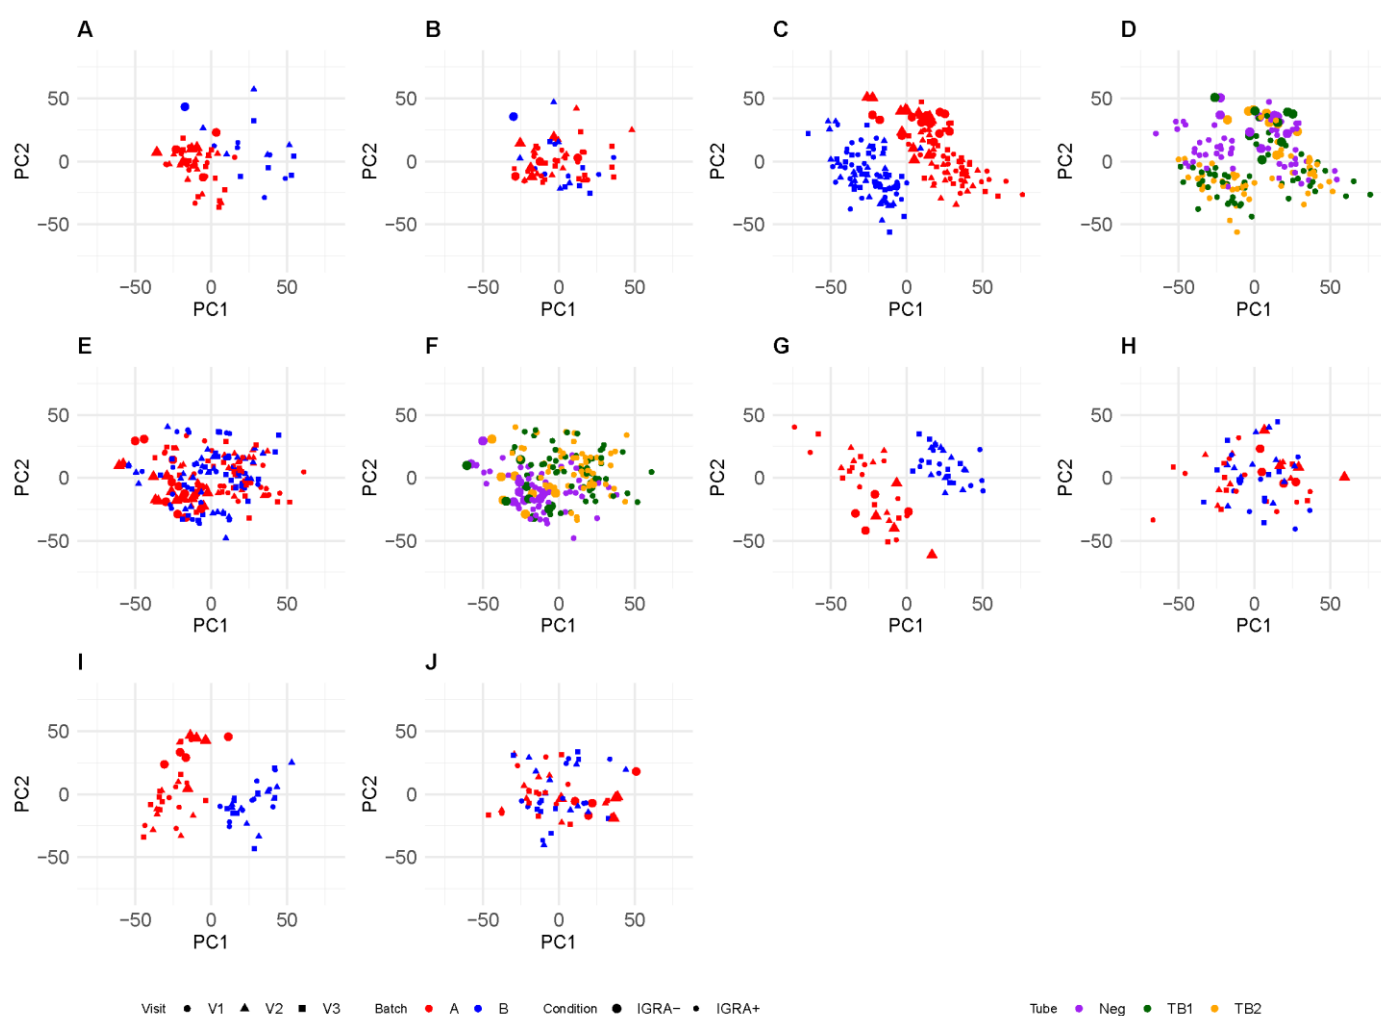

723 **Figure 2- figure supplement 1**

724 Volcano plots showing genes significantly differentially expressed between stimulated (QuantiFERON  
725 Gold Plus TB1 and TB2 tubes) and unstimulated (QuantiFERON Gold Plus negative tubes) blood  
726 samples. Genes overexpressed in stimulated blood with log<sub>2</sub>Foldchange (LFC) >1 and BH adjusted p  
727 value <0.05 are shown in red. Genes underexpressed in stimulated blood with LFC <-1 and BH adjusted  
728 p value <0.05 are shown in blue. Genes with LFC >2.7 and <-1.7 are annotated with their gene symbols.  
729 Plots are shown for IGRA+ subjects, comparing TB1 vs. negative tube samples (A), and TB2 vs. negative  
730 tube samples (B) at visit 1. Also shown are plots for IGRA- subjects, comparing TB1 vs. negative tube  
731 samples (C), and TB2 vs. negative tube samples (D) at visit 1.  
732

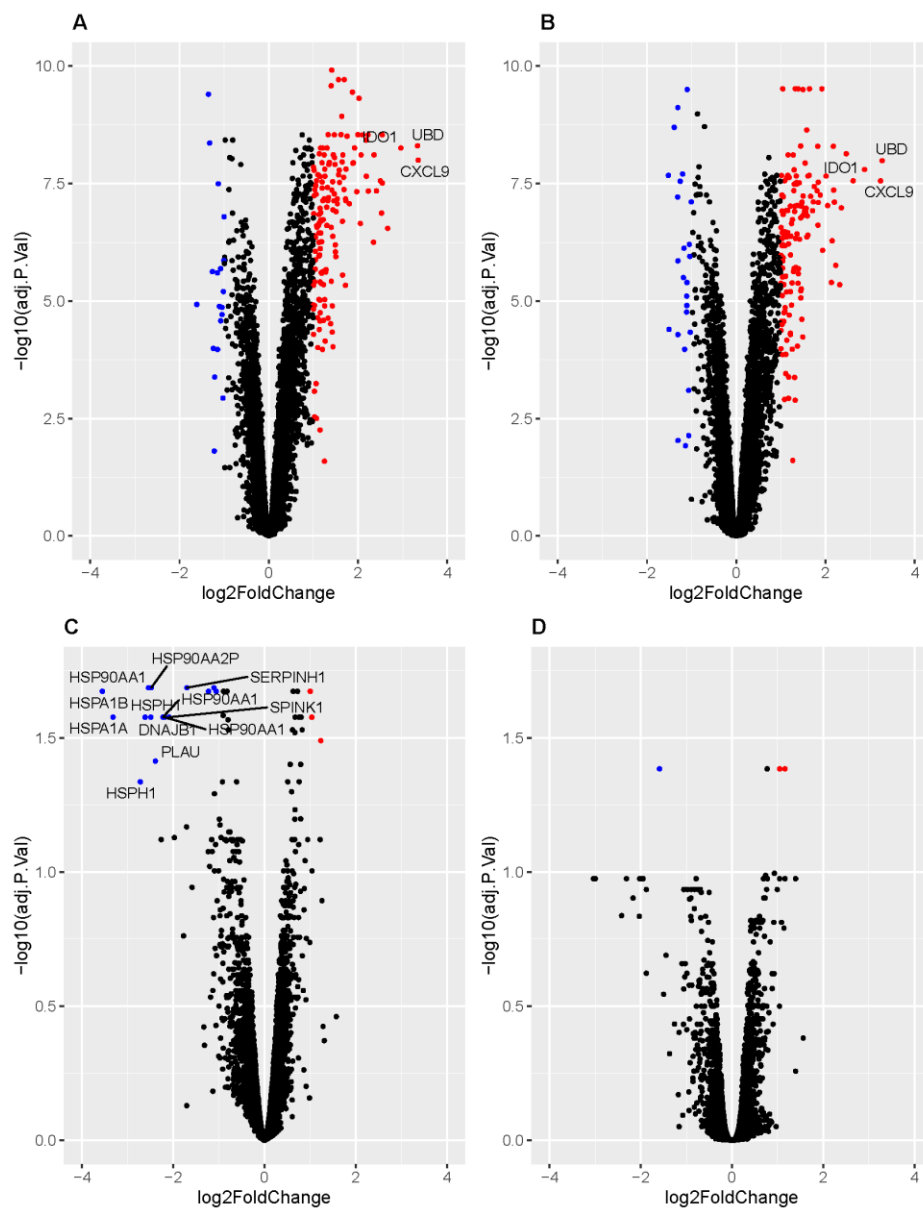

733

734

735 **Figure 4 - figure supplement 1**

736 Cibersortx was used to estimate the abundance of different cell types in the TB2-stimulated whole  
737 blood samples at each visit. Scatterplots showing the change cellular fractions over the time-course  
738 of the study period in IGRA+ subgroups A and B for Total monocyte fraction (A), Total lymphocyte  
739 fraction (B), Total CD4+ T cell fraction (C), Neutrophil fraction (D). Visit 1 is 0 weeks, Visit 2 is 2 weeks  
740 and Visit 3 is 13 weeks, with 90% confidence intervals shown.

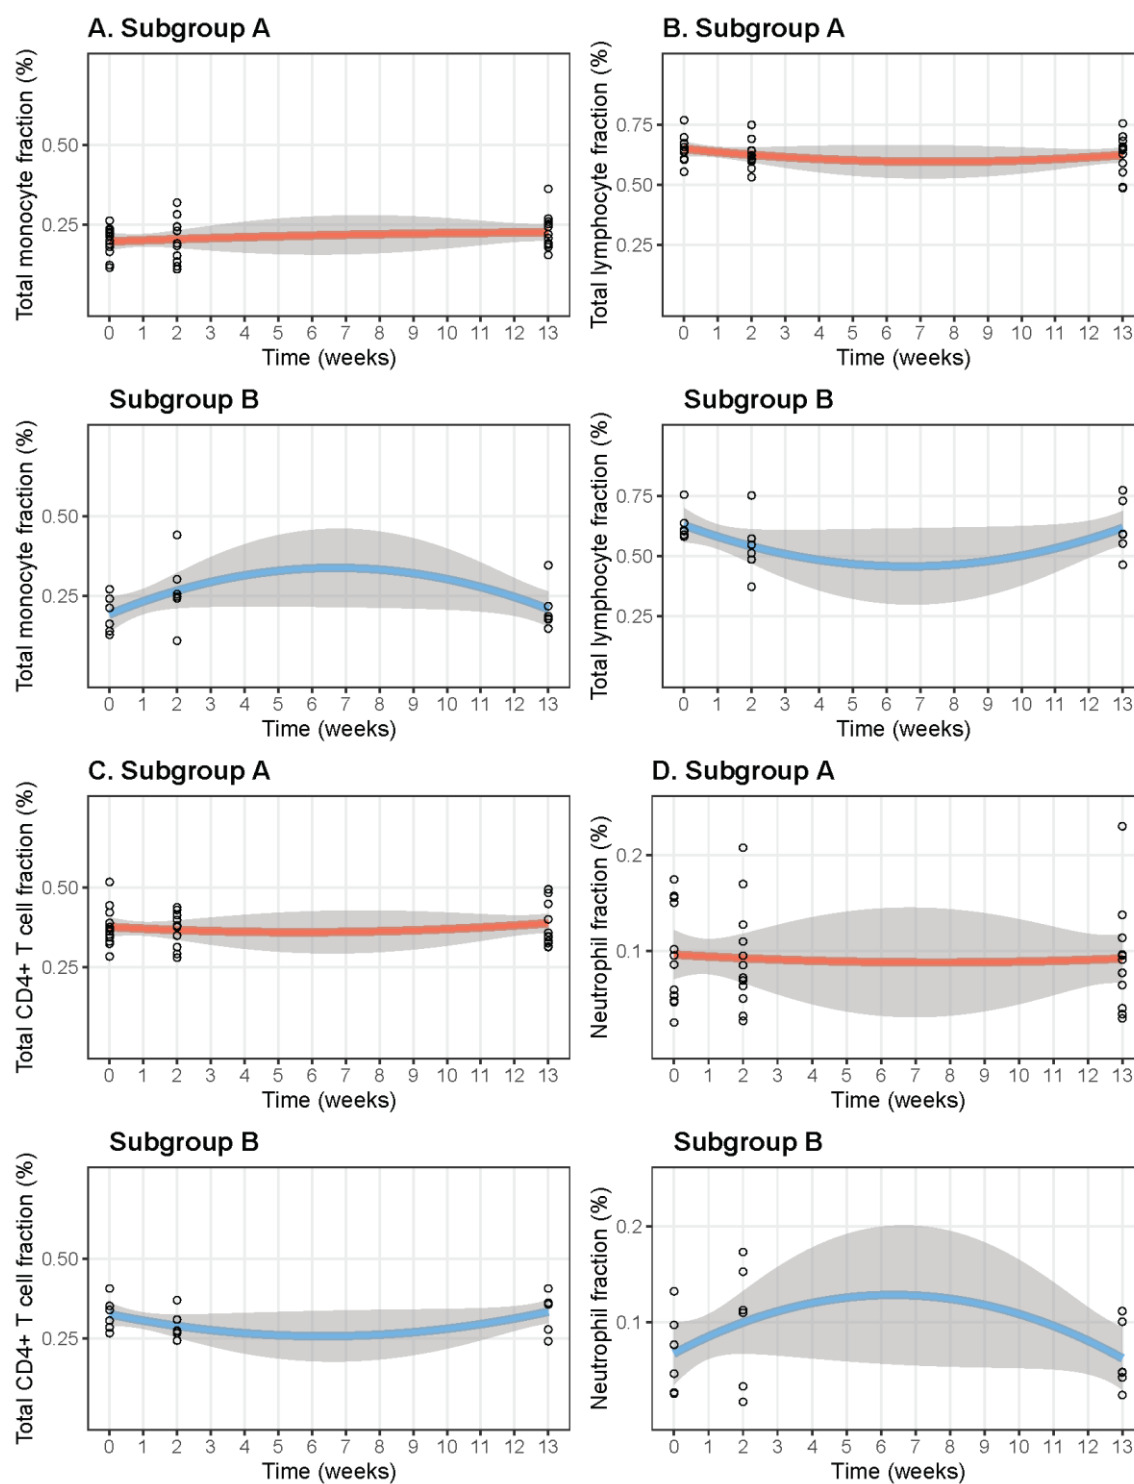

741

742 **Supplementary Files**

743

744 Supplementary File 1: Significantly differentially expressed (SDE) transcripts IGRA+ vs IGRA-  
745 in TB1 tubes at Visit (V) 1 and V2 and in TB2 tubes at V1 and V2.

746 Supplementary File 2: SDE transcripts TB1 vs negative tube, TB2 vs negative tube at V1, in  
747 IGRA+.

748 Supplementary File 3: SDE transcripts TB1 vs negative tube, TB2 vs negative tube at V1, in  
749 IGRA-.

750 Supplementary File 4: 474 most variable transcripts (TB2-stimulated samples).

751 Supplementary File 5: MaSigPro results: transcripts SDE though time, Cluster 1 vs Cluster 2.

752 Supplementary File 6: Results of biological pathways analysis using Reactome pathway  
753 knowledgebase.
